# Supplementary material for: Thermally driven interfacial diffusion synthesis of nitrogen-doped carbon confined trimetallic Pt3CoRu composites for the methanol oxidation reaction
Source: Royal Society of Chemistry journal article supplement (doi:10.1039/c9ta04412d), 2019-01-01
Supplement: c9ta04412d1.pdf [file c9ta04412d1.pdf]

# Thermally Driven Interfacial Diffusion Synthesis of Nitrogen-Doped Carbon Confined Trimetallic Pt<sub>3</sub>CoRu Composites for Methanol Oxidation Reaction

Qingmei Wang, Siguo Chen,\* Huiying Lan, Pan Li, Xinyu Ping, Shumaila Ibraheem, Daojun Long, Yijun Duan,  
Zidong Wei\*

The State Key Laboratory of Power Transmission Equipment & System Security and New Technology, Chongqing  
Key Laboratory of Chemical Process for Clean Energy and Resource Utilization, School of Chemistry and Chemical  
Engineering, Chongqing University, Chongqing 400044, China.

## Corresponding Author

[\\*csg810519@126.com](mailto:csg810519@126.com)

[\\*zdwei@cqu.edu.cn](mailto:zdwei@cqu.edu.cn)

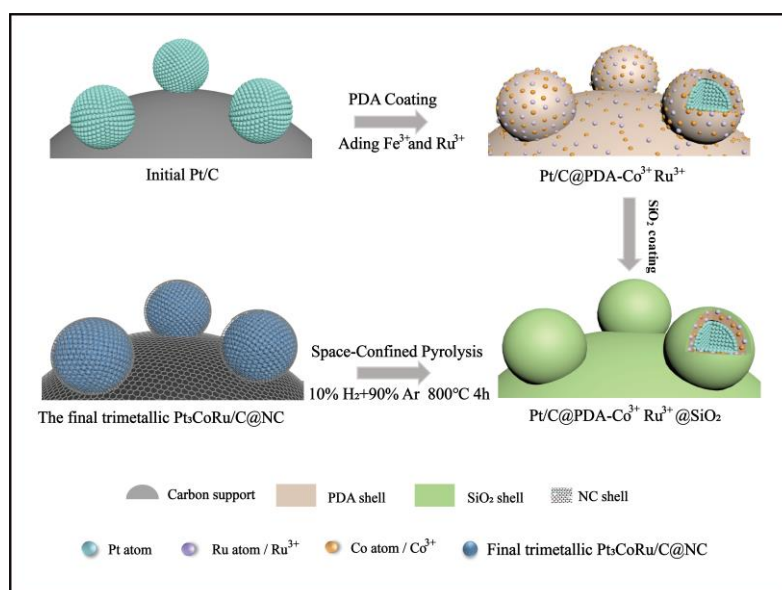

**Figure S1.** Schematic fabrication of trimetallic Pt<sub>3</sub>CoRu/C@NC catalyst based on thermally driven interfacial diffusion alloying method.

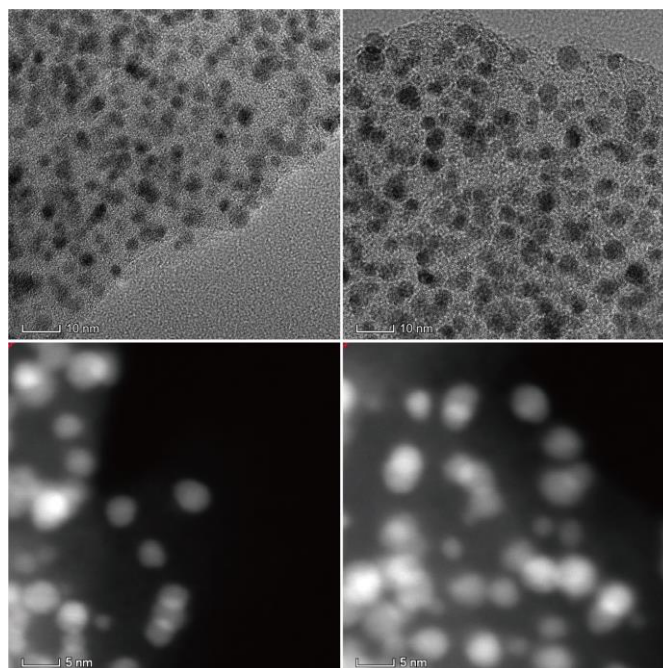

**Figure S2.** The TEM and HR-TEM images of the prepared Pt<sub>3</sub>CoRu/C@NC sample.

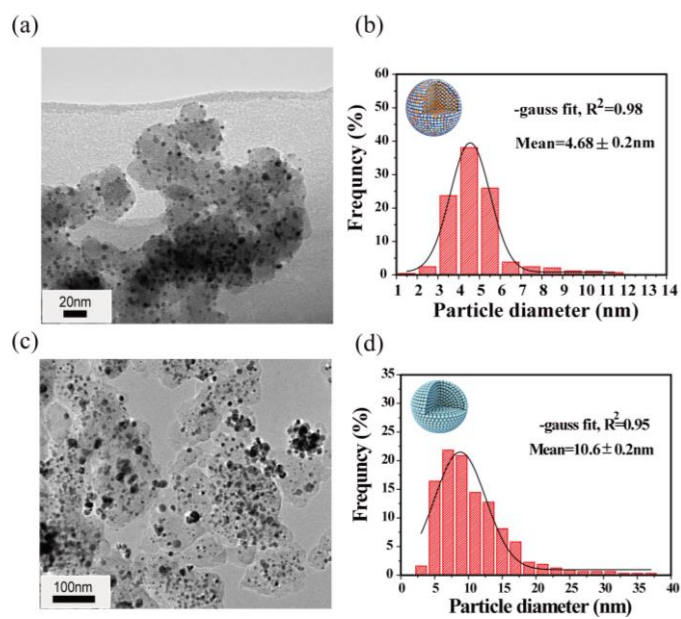

**Figure S3.** TEM images and the corresponding particle size statistics of the Pt<sub>3</sub>CoRu/C@NC and commercial Pt/C catalysts after high-temperature annealing.

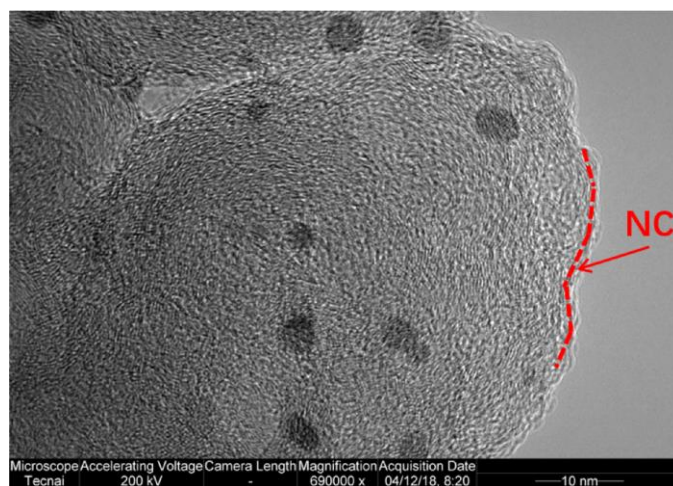

**Figure S4.** The HRTEM images of the Pt<sub>3</sub>CoRu/C@NC catalysts.

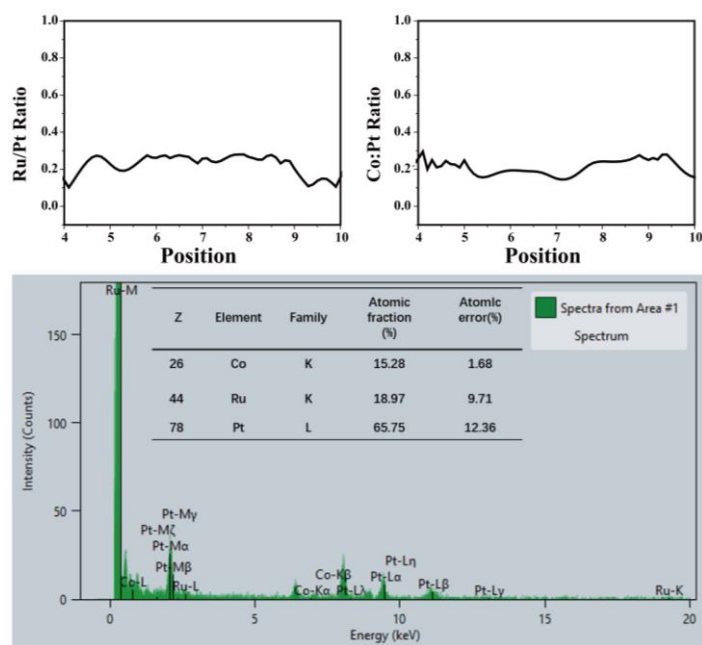

**Figure S5.** The Ru/Pt and Co/Pt atomic ratio from EELS and the corresponding EDX profile and atomic fraction of the Pt<sub>3</sub>CoRu/C@NC NP.

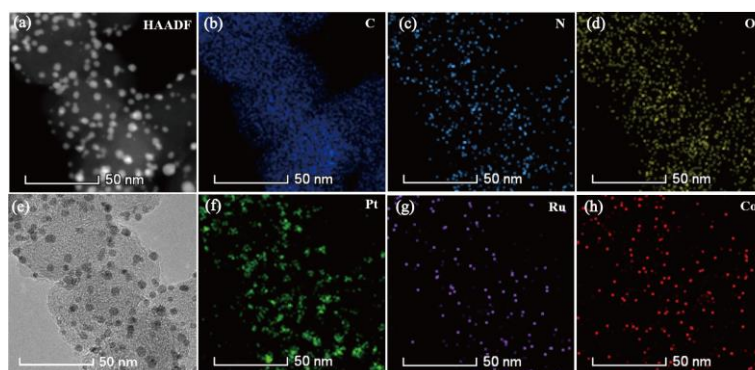

**Figure S6.** HAADF-STEM images of the Pt<sub>3</sub>CoRu/C@NC catalysts (a) and the corresponding elemental mapping (b-h).

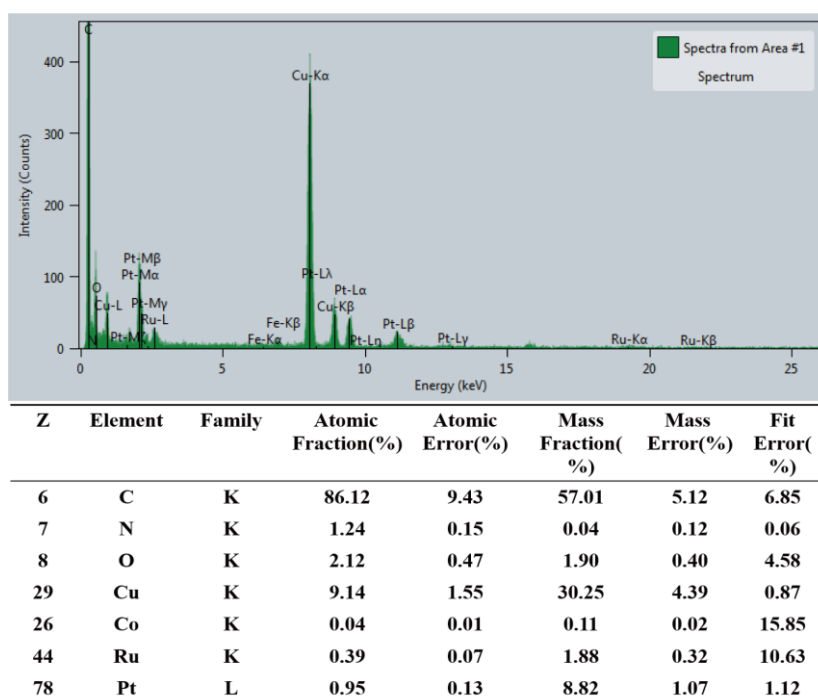

**Figure S7.** The EDX profile and corresponding atomic fraction of the Pt<sub>3</sub>CoRu/C@NC catalyst.

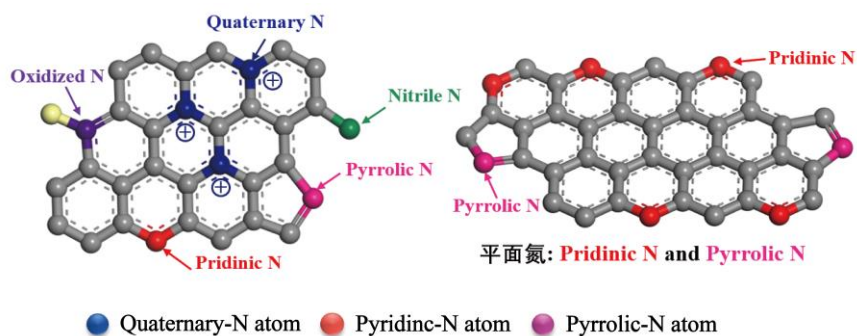

**Figure S8.** The illustration of the corresponding pyrrolic-N and pyridinic-N quaternary-N respectively.

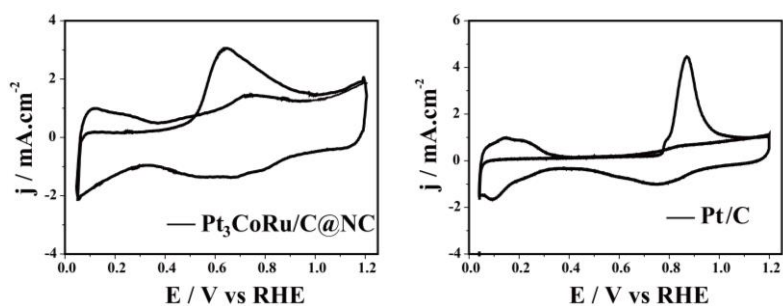

**Figure S9.** The detailed CO stripping curves of the Pt<sub>3</sub>CoRu/C@NC and commercial Pt/C catalysts.

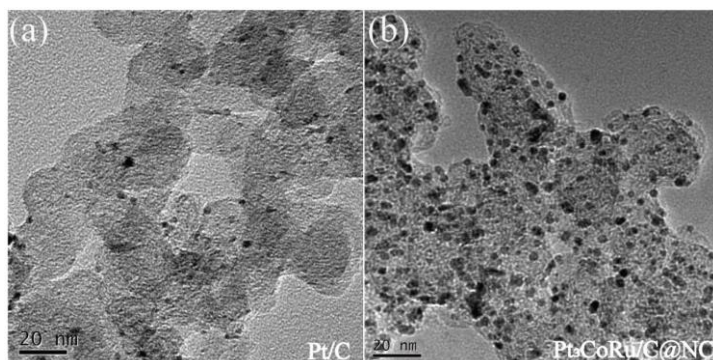

**Figure S10.** The TEM images of the Pt/C and Pt<sub>3</sub>CoRu/C@NC catalyst after under a constant potential of 0.75VRHE for 6000s.

| Catalysts                                          | I <sub>r</sub> :I <sub>b</sub> | Peak currents from CV                              |                 |                             | Electrolytes                                      | References |
|----------------------------------------------------|--------------------------------|----------------------------------------------------|-----------------|-----------------------------|---------------------------------------------------|------------|
|                                                    |                                | Onset<br>Potential(v)of CO<br>oxidation<br>(vsRHE) | curves          |                             |                                                   |            |
|                                                    |                                |                                                    | MA<br>(A/mg pt) | SA<br>(mA/cm <sup>2</sup> ) |                                                   |            |
|                                                    |                                |                                                    |                 |                             |                                                   |            |
| Fe@(PtRu) NPs                                      | ---                            | 0.295 vs NHE                                       | 0.819           | ---                         | 0.1 M HClO <sub>4</sub> +1 M Methanol             | 1          |
| PtRuFe NWs                                         | ---                            | 0.41                                               | ---             | 2.4                         | 0.1 M HClO <sub>4</sub> + 0.5 M Methanol          | 2          |
| PtPdRu spheres                                     | 0.97                           | ---                                                | 0.294           | ---                         | 0.5 M HClO <sub>4</sub> + 0.5 M Methanol          | 3          |
| FePtPd NWs                                         | 1.09                           | ---                                                | 0.489           | ---                         | 0.1 M HClO <sub>4</sub> + 0.2 M Methanol          | 4          |
| Pt <sub>4</sub> Ru <sub>4</sub> Fe <sub>2</sub> /C | ---                            | 0.4                                                | 0.11            | 1.31                        | 1 M H <sub>2</sub> SO <sub>4</sub> + 1 M methanol | 5          |
| Pt <sub>3</sub> Ru <sub>3</sub> Fe <sub>2</sub> /C | ---                            | 0.3                                                | 0.107           | 1.22                        | 1 M H <sub>2</sub> SO <sub>4</sub> + 1 M Methanol | 5          |
| Au/Ag/Pt                                           | ---                            | ---                                                | 0.98            | 1.33                        | 1 M H <sub>2</sub> SO <sub>4</sub> + 1 M Methanol | 6          |
| PtRuCu/C dendrites                                 | 1.32                           | 0.47                                               | 1.13            | 1.20                        | 0.1 M HClO <sub>4</sub> + 1 M Methanol            | 7          |
| Pt <sub>3</sub> CoRu/C@NC                          | 2.50                           | 0.35                                               | 0.97            | 1.60                        | 0.1 M HClO <sub>4</sub> + 0.5 M Methanol          | This work  |

**Table S1.** A brief comparison of the MOR electrochemical activity of the catalysts reported in the currently literature to the trimetallic Pt<sub>3</sub>CoRu/C@NC catalyst.

## Reference:

- (1) M. A. Matin, E. J. Lee, H. Y. C. Kim, Won-Sub. Yoone, Young-Uk. Kwon, Rational syntheses of core-shell Fe@(PtRu) nanoparticle electrocatalysts for the methanol oxidation reaction with complete suppression of CO-poisoning and highly enhanced activity. *J. Mater. Chem. A.* 3 (2015) 17154.
- (2) Megan E. Scofield, Christopher Koenigsmann, L. Wang, H. Q. Liu, Stanislaus S. Wong, Tailoring the composition of ultrathin, ternary alloy PtRuFe nanowires for the methanol oxidation reaction and formic acid oxidation reaction. *Energy. Environ. Sci.* 8 (2015) 350.
- (3) B. Jiang, H. Atae-Esfahani, C. L. Li, M. Alshehri, T. Ahamad, J. Henzie, Y. Yamauchi. Mesoporous Trimetallic PtPdRu Spheres as Superior Electrocatalysts, *Chem. Eur. J.* 22 (2016) 7174 -7178.

- (4) J. Y. Tang, D. Chen, C. Y. Li, X. F. Yang, H. Liu, J. Yang, Fine silver sulfide–platinum nanocomposites supported on carbon substrates for the methanol oxidation reaction. *RSC Adv.* 7 (2017) 3455.
- (5) K. R. Lee, M. K. Jeon, S. I. Woo, Composition optimization of PtRuM/C (M = Fe and Mo) catalysts for methanol electro-oxidation via combinatorial method. *Appl. Catal. B: Environ.* 91 (2009) 428-433.
- (6) X. B. Xie, G. H. Gao, S. D. Kang, T. Shibayama, Y. H. Lei, D. Y. Gao, L. T. Cai, Site-Selective Trimetallic Heterogeneous Nanostructures for Enhanced Electrocatalytic Performance, *Adv. Mater.* 27 (2015) 5573-5577.
- (7) S. F. Xue, W. T. Deng, F. Yang, J. L. Yang, Ibrahim. Saana. Amiin, D. P. He, H. L. Tang, S. C. Mu. Hexapod PtRuCu Nanocrystalline Alloy for Highly Efficient and Stable Methanol Oxidation, *ACS Catal.* 8 (2018) 7578-7584.
